# Supplementary material for: Enhanced Antibacterial Activity of Poly (dimethylsiloxane) Membranes by Incorporating SiO2 Microspheres Generated Silver Nanoparticles
Source: PubMed Central journal article supplement (PMC6566769; doi:10.3390/nano9050705), 2019-05-06
Supplement: nanomaterials-09-00705-s001.pdf [file nanomaterials-09-00705-s001.pdf]

---

# Enhanced Antibacterial Activity of poly (dimethylsiloxane) Membranes by Incorporating SiO<sub>2</sub> Microspheres Generated Silver Nanoparticles

Qihui Shen <sup>1,2</sup>, Yixuan Shan <sup>1</sup>, Yang Lü <sup>1</sup>, Peng Xue <sup>2</sup>, Yan Liu <sup>1,2,\*</sup> and Xiaoyang Liu <sup>2,\*</sup>

<sup>1</sup> Department of Chemistry and Pharmaceutical Engineering, Jilin Institute of Chemical Technology, Jilin 132022, China; [shenqhui@gmail.com](mailto:shenqhui@gmail.com) (Q.S.); [syx13654354458@hotmail.com](mailto:syx13654354458@hotmail.com) (Y.S.); [lyyang198511@gmail.com](mailto:lyyang198511@gmail.com) (Y.L.)

<sup>2</sup> State Key Laboratory of Inorganic Synthesis and Preparative Chemistry, College of Chemistry, Jilin University, Changchun 130012, China; [xuepeng16@mails.jlu.edu.cn](mailto:xuepeng16@mails.jlu.edu.cn)

\* Correspondence: [ly@jlict.edu.cn](mailto:ly@jlict.edu.cn) (Y.L.); [liuxy@jlu.edu.cn](mailto:liuxy@jlu.edu.cn) (X.L.); Tel.: +86-432-62185233 (Y.L.); +86-431-85168316 (X.L.)

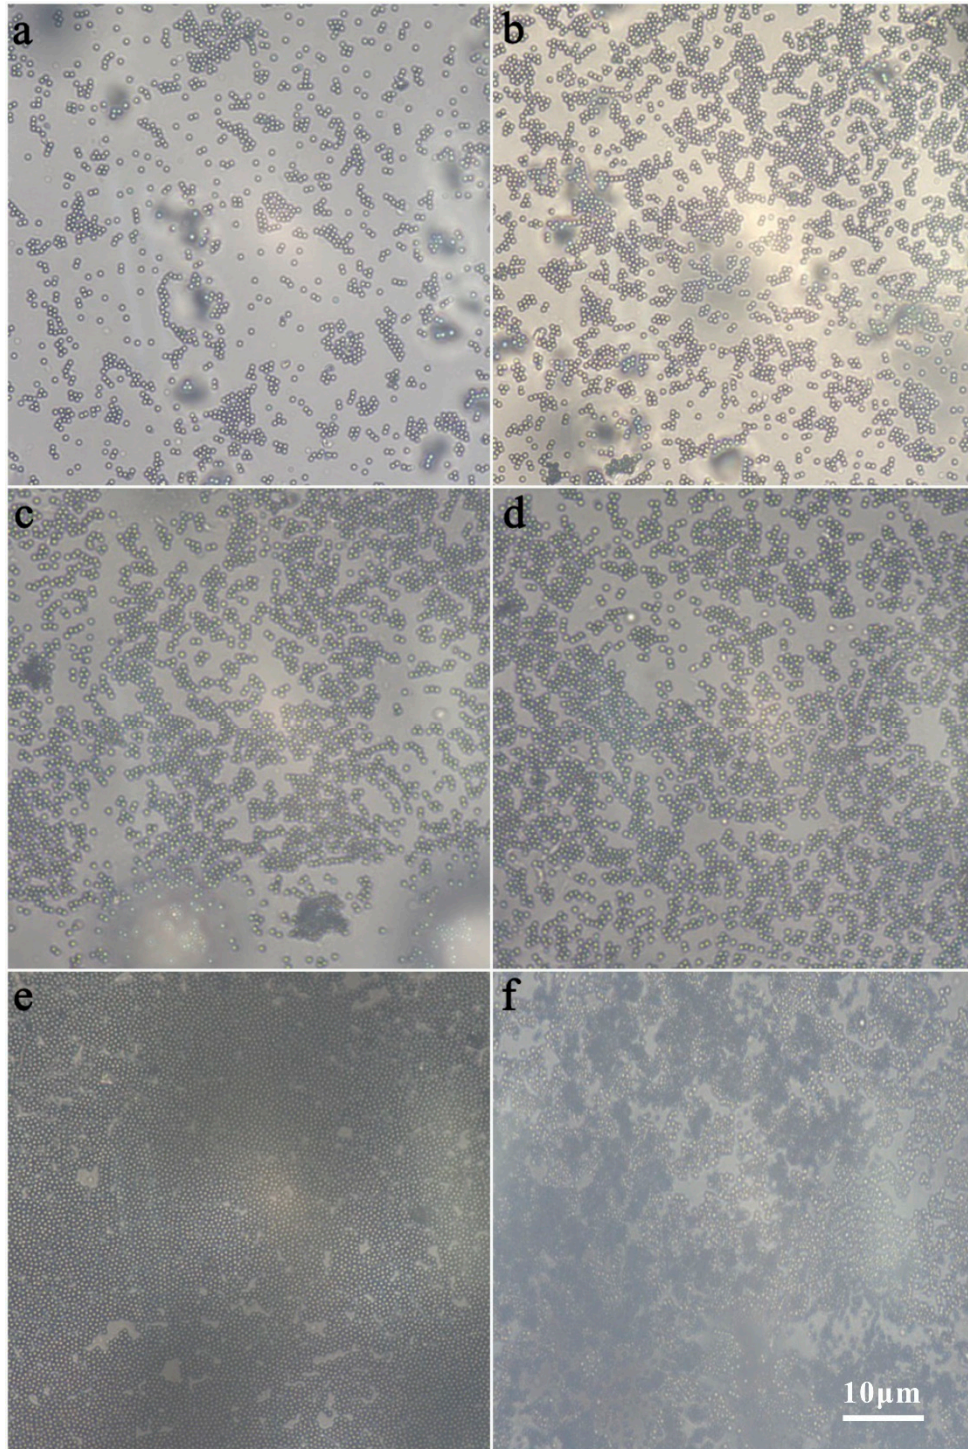

**Figure 1.** Optical microscope images of PDMS with different concentrations of SMs were assembled on their surface. ( $\times 10^7$  particles/mL. a:  $2.08 \pm 0.02$ ; b:  $2.76 \pm 0.02$ ; c:  $3.45 \pm 0.02$ ; d:  $3.99 \pm 0.02$ ; e:  $4.35 \pm 0.02$ ; f:  $5.06 \pm 0.02$ ).

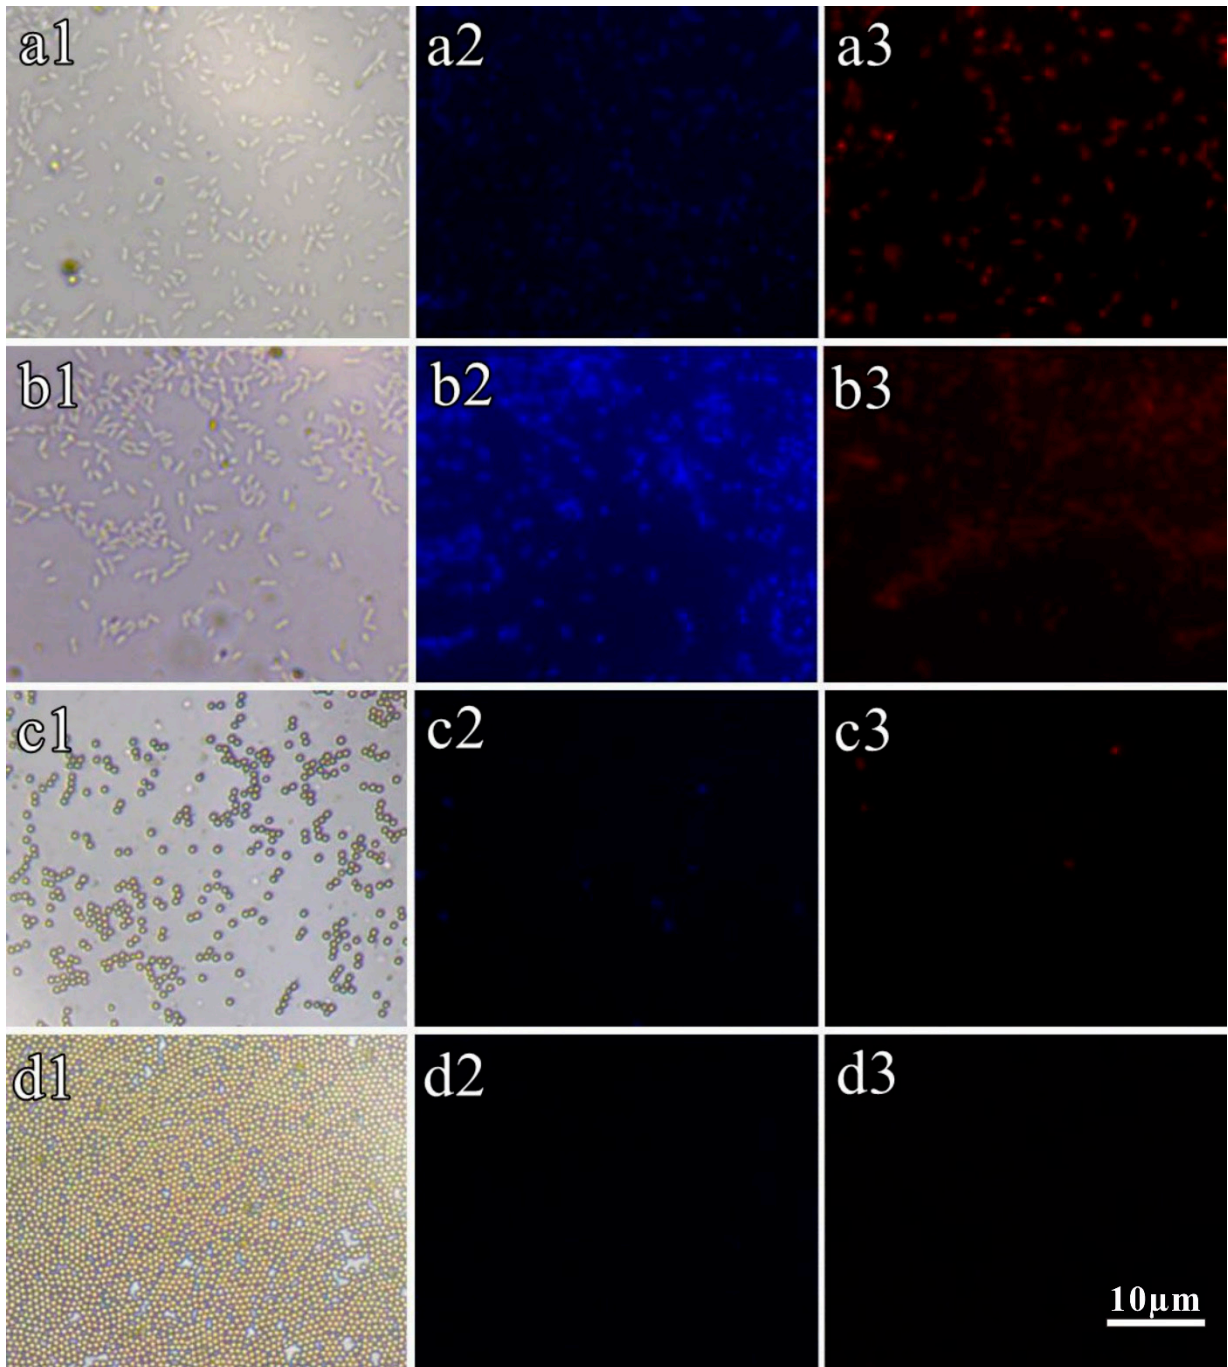

**Figure 2.** Growth of *E. coli* on the surface of PDMS, PDMS-SMs, PDMS-SMs-AgNPs (sparse/tight). Fluorescent microscopy images of *E. coli* after incubation with (a) PDMS; (b) PDMS-SMs; (c) Sparse AgNPs coated PDMS; (d) AgNPs coated PDMS tightly. Cells with blue fluorescence represent all bacteria (2), whereas the red images are representative of dead bacteria (3).



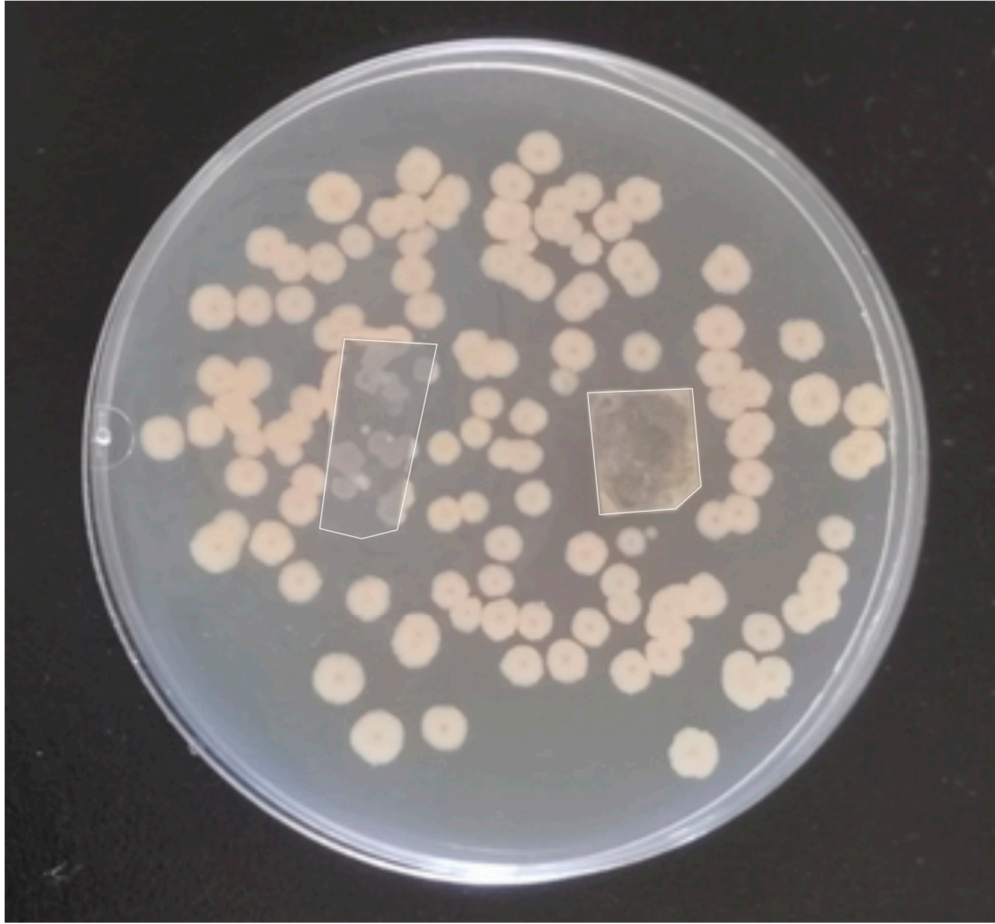

**Figure 3.** ZOI assay of PDMS (left) and PDMS-SMs-AgNPs (right) with *Bacillus subtilis* after 24 h incubation at 37 °C.

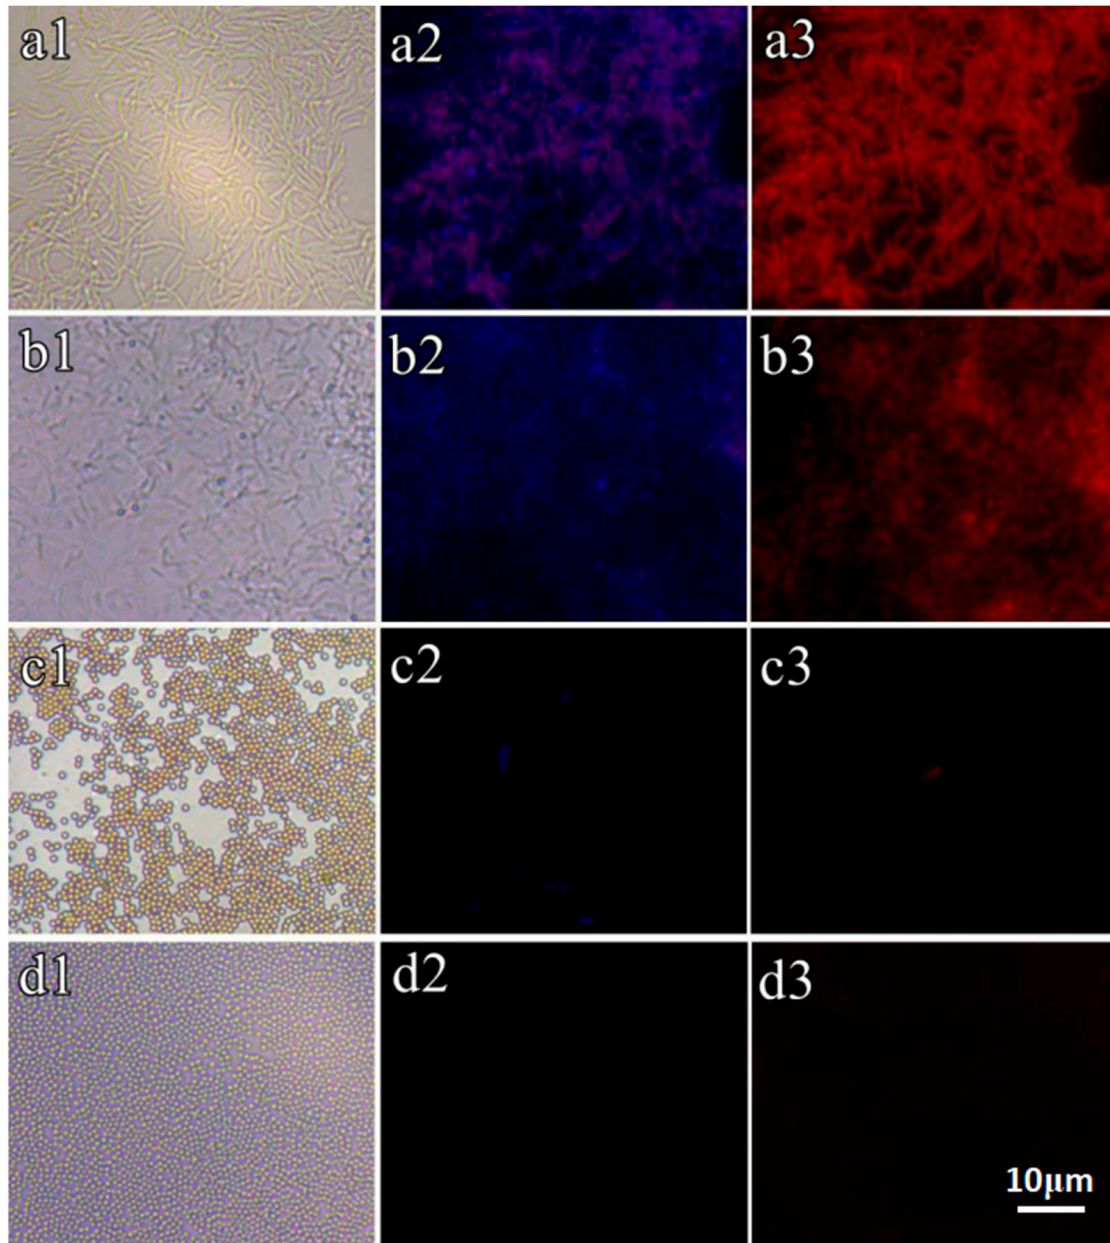

**Figure S4.** Bright field (1) Fluorescent microscopy (2, 3) images of *Bacillus subtilis* after incubation with (a) PDMS; (b) PDMS modified with SMs; (c) Sparse AgNPs coated PDMS; (d) AgNPs coated PDMS tightly. Cells with blue fluorescence represent all bacteria (1), whereas the red images are representative of dead bacteria (3).

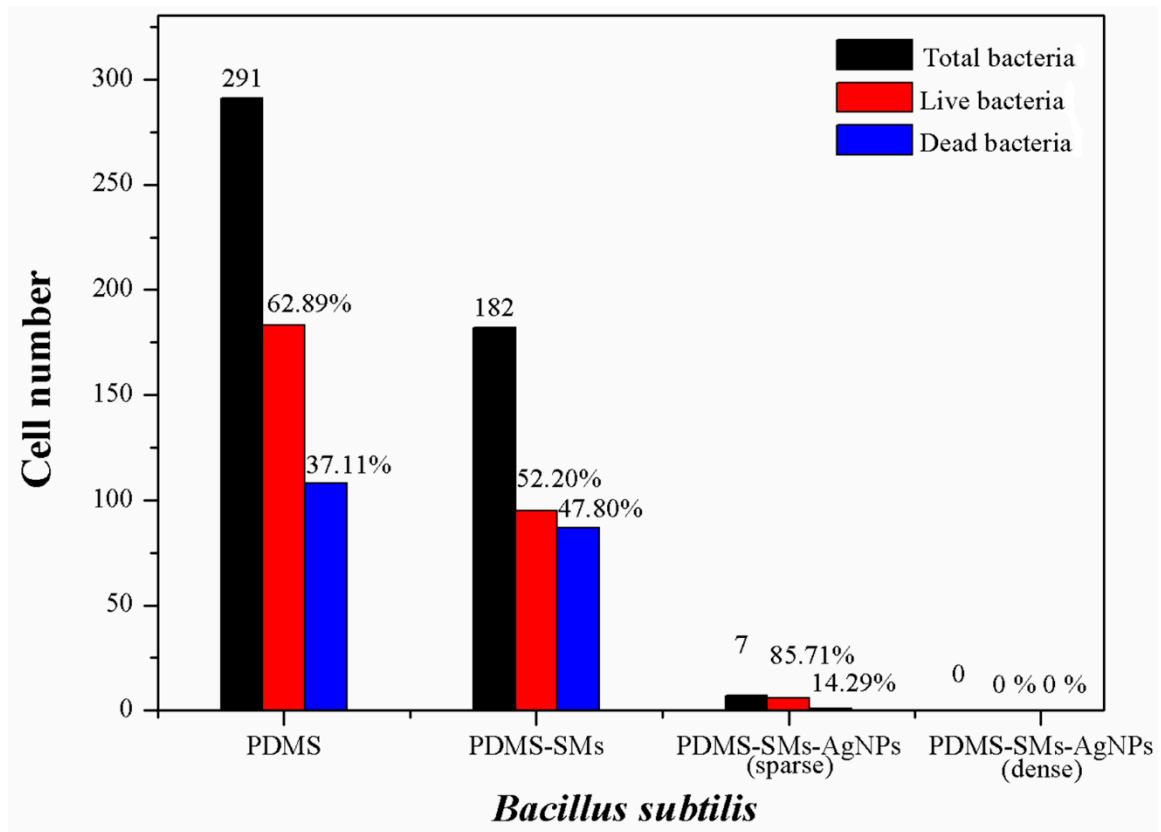

**Figure S5.** Cell numbers of *Bacillus subtilis* growing on the PDMS, PDMS-SMs, sparse/tight SMs-AgNPs modified PDMS. There is no *Bacillus subtilis* observed on the tight PDMS-SMs-AgNPs.
